# Supplementary material for: Characterization of different adipose depots in fattened buffalo: histological features and expression profiling of adipocyte markers
Source: Copernicus journal article supplement (doi:10.5194/aab-63-61-2020), 2020-02-21
Supplement: Supplementary file [file aab-63-61-2020-supplement.pdf]

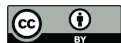

## *Supplement of*

# **Characterization of different adipose depots in fattened buffalo: histological features and expression profiling of adipocyte markers**

**Jieping Huang et al.**

*Correspondence to:* Yun Ma (mayun\_666@126.com) and Bizhi Huang (hbz@ynbp.cn)

The copyright of individual parts of the supplement might differ from the CC BY 4.0 License.

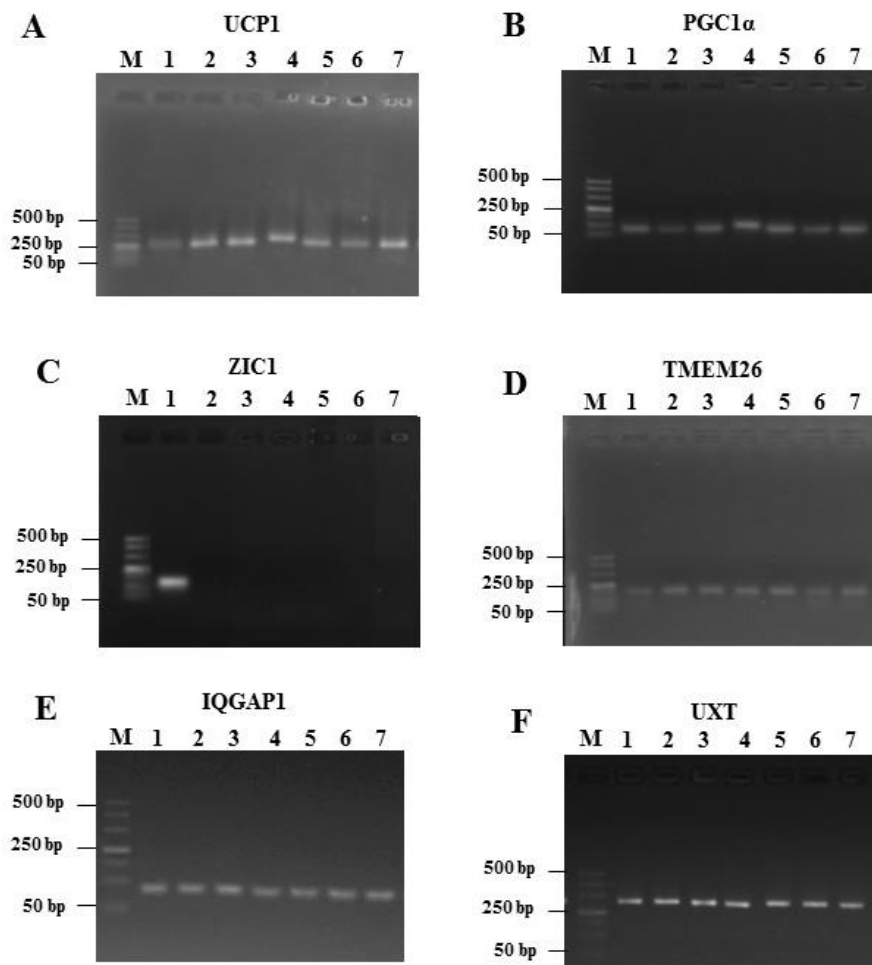

**Figure S1 Detection of qRT-PCR products by agarose gel electrophoresis.** M, Marker 500. 1-7, back, sternum, inguinal, perirenal, mesenteric, pericardial, and omental fats, respectively.
